# Supplementary material
Source: ML conference proceedings conference paper supplement (https://openreview.net/forum?id=N0LRisF0ZU)
Supplement: supplementary_material [file All Test Videos Link.docx]

Test 1 videos produced by 2 groups of participants

MetaEcho Group

<https://file.io/DOjw1MIt5j9Q>

<https://file.io/iw0KcfHyk5mO>

<https://file.io/KCyoQELXcYhl>

<https://file.io/XLC54utZNlka>

<https://file.io/XCRD6Tw63zBX>

<https://file.io/e8K4GqvTO2zd>

<https://file.io/b3D9jr2fHPwL>

<https://file.io/AntVRpZgLzI5>

<https://file.io/hdEq364QAO3A>

<https://file.io/cvrdQBfBiUdq>

<https://file.io/gmYSWzHDvapo>

<https://file.io/ctsdr4wS06PU>

PPT Group

<https://file.io/z2M3v2u7N9Zk>

<https://file.io/pj0cBxsQyoGK>

<https://file.io/8YJ1P3ZmPz8G>

<https://file.io/nAfjtY7LAAee>

<https://file.io/mHGs7OBckZ46>

<https://file.io/gRT8EGtTjZe2>

<https://file.io/CdDCqdEQA115>

<https://file.io/TV8Nj7zJbRUp>

<https://file.io/qMk6WEDpkMoQ>

<https://file.io/BsWwu2wc4tol>

<https://file.io/Y5EExsqPWV9u>

https://file.io/J2WuVbnig0Pv
