# Supplementary material
Source: ML conference proceedings conference paper supplement (https://openreview.net/forum?id=N0LRisF0ZU)
Supplement: supplementary_material [file Expert raw data .xlsx]

## Sheet: Sheet1
	User No. （PPT Group）	Expert1	Sound Quality （0-3）	Technical Capability（0-3）	The Shotgun mic is not in the video （0-1）	Total	Expert2	Sound Quality （0-3）	Technical Capability（0-3）	The Shotgun mic is not in the video （0-1）	Total	Expert3	Sound Quality （0-3）	Technical Capability（0-3）	The Shotgun mic is not in the video （0-1）	Total
	1		2	2	1	5		3	3	1	7		2	2	1	5
	2		1	2	1	4		1	1	1	3		1	1	1	3
	3		1	2	1	4		1	2	1	4		1	1	1	3
	4		1	1	1	3		1	1	1	3		1	1	1	3
	5		1	1	1	3		1	0	1	2		1	0	1	2
	6		1	2	1	4		2	2	1	5		1	2	1	4
	7		1	2	1	4		1	2	1	4		2	2	1	5
	8		1	2	1	4		1	2	0	3		1	2	0	3
	9		1	2	1	4		1	1	1	3		1	2	1	4
	10		1	1	0	3		1	2	0	3		1	1	0	2
	11		2	2	1	5		2	2	1	5		2	2	1	5
	12		1	2	1	4		2	2	1	5		1	2	1	4
	User No. （MetaEcho）	Expert1	Sound Quality （0-3）	Technical Capability（0-3）	The Shotgun mic is not in the video （0-1）	Total	Expert2	Sound Quality （0-3）	Technical Capability（0-3）	The Shotgun mic is not in the video （0-1）	Total	Expert3	Sound Quality （0-3）	Technical Capability（0-3）	The Shotgun mic is not in the video （0-1）	Total
	1		1	2	1	4		1	2	1	4		2	2	1	5
	2		1	2	1	4		2	2	1	5		2	1	1	4
	3		2	2	1	5		3	2	1	6		3	3	1	7
	4		0	0	0	0		1	0	0	1		0	0	0	0
	5		1	2	1	4		1	2	1	4		1	2	1	4
	6		1	2	1	4		2	2	1	5		2	2	1	5
	7		1	2	1	4		2	3	1	6		2	2	1	5
	8		1	2	1	4		1	1	1	3		2	2	1	5
	9		1	2	1	4		3	2	1	6		2	2	1	5
	10		1	2	1	4		1	2	1	4		2	1	1	4
	11		1	2	1	4		1	2	0	3		1	2	1	4
	12		1	2	1	4		3	2	1	6		3	2	1	6
