# Supplementary material
Source: ML conference proceedings conference paper supplement (https://openreview.net/forum?id=N0LRisF0ZU)
Supplement: supplementary_material [file Questionnaire raw data.xlsx]

## Sheet: Sheet1
	PPT Group	Presence		Collaboration		Usability		Realism		Comprehensibility		Creativity
		I can undeI could feel like I was there to operate the boom	I could feel the environment as if I were in the studio	I could communicate with teachers and students about the course content	I could work with teachers and students to complete the task collaboratively	I found the synchronized sound recording instruction to be very functional	I would choose the same mode of course delivery	I think this course is sufficiently realistic to help my operation of synchronized sound recording equipment	I think this course content is true to help understand synchronized sound recording	I can understand how to conduct synchronous sound recording through descriptions of sound	I can focus on sound sources in scenes to better understand types of sound sources	I can focus on teaching scenarios to stimulate my creativity	I can leverage variations in sound to design creative audio effects
		6	6	6	7	7	7	6	7	6	7	7	7
		1	2	1	1	1	1	2	1	1	2	1	3
		1	1	4	2	5	1	1	4	5	7	1	4
		3	2	3	3	2	3	3	3	4	4	3	4
		2	2	2	2	1	1	2	1	1	1	2	2
		5	6	6	6	6	6	6	6	6	6	6	6
		2	2	3	1	3	4	2	2	2	4	3	2
		2	1	6	1	5	5	5	5	5	2	2	1
		2	1	5	2	5	1	1	3	3	1	2	2
		2	2	4	2	5	4	3	5	3	2	2	1
		3	3	1	2	4	4	5	2	6	2	3	2
		2	2	4	2	2	1	3	2	2	2	2	2
	MetaEcho Group	Presence		Collaboration		Realism		Realism		Comprehensibility		Creativity
		I can undeI could feel like I was there to operate the boom	I could feel the environment as if I were in the studio	I could communicate with teachers and students about the course content	I could work with teachers and students to complete the task collaboratively	I found the synchronized sound recording instruction to be very functional	I would choose the same mode of course delivery	I think this course is sufficiently realistic to help my operation of synchronized sound recording equipment	I think this course content is true to help understand synchronized sound recording	I can understand how to conduct synchronous sound recording through descriptions of sound	I can focus on sound sources in scenes to better understand types of sound sources	I can focus on teaching scenarios to stimulate my creativity	I can leverage variations in sound to design creative audio effects
		6	6	7	6	5	3	4	5	5	7	5	5
		7	6	7	6	5	7	6	7	7	6	7	5
		7	7	7	7	7	7	7	7	7	7	7	7
		7	7	7	7	7	7	7	7	7	7	7	7
		6	5	7	7	6	7	6	7	6	7	7	5
		3	6	6	5	4	5	4	5	4	7	6	4
		6	7	6	5	7	6	5	6	7	7	5	4
		5	6	7	7	7	6	7	6	7	7	7	6
		6	6	5	5	5	5	5	6	6	6	6	6
		7	7	7	7	7	7	7	7	7	7	7	7
		6	6	7	7	7	7	6	6	6	7	7	7
		6	6	7	7	7	7	7	7	7	7	7	7
