# Supplementary material
Source: ML conference proceedings conference paper supplement (https://openreview.net/forum?id=N0LRisF0ZU)
Supplement: supplementary_material [file Questionnaire.xlsx]

## Sheet: Sheet1
Questionnaire indicators/topics	Questionnaire questions (1-7 points)
Presence	I could feel like I was there to operate the boom
	I could feel the environment as if I were in the studio
Collaboration	I could communicate with teachers and students about the course content
	I could work with teachers and students to complete the task collaboratively
Usability	I found the synchronized sound recording instruction to be very functional
	I would choose the same mode of course delivery
Realism	I think this course is sufficiently realistic to help my operation of synchronized sound recording equipment
	I think this course content is true to help understand synchronized sound recording
Comprehensibility	I can understand how to conduct synchronous sound recording through descriptions of sound
	I can focus on sound sources in scenes to better understand types of sound sources
Creativity	I can focus on teaching scenarios to stimulate my creativity
	I can leverage variations in sound to design creative audio effects
