# Supplementary material
Source: ML conference proceedings conference paper supplement (https://openreview.net/forum?id=N0LRisF0ZU)
Supplement: supplementary_material [file Test2 data.xlsx]

## Sheet: Sheet1
	User No. （PPT Group）	Total		User No. （MetaEcho）	Total
	1	2		1	3
	2	3		2	1
	3	3		3	3
	4	1		4	2
	5	1		5	3
	6	1		6	4
	7	1		7	3
	8	3		8	4
	9	2		9	3
	10	2		10	4
	11	3		11	2
	12	1		12	4
	Recording issues in test video: 1:There is a continuous electrical noise (possibly due to line interference or poor equipment contact). 2:The sound distorts when chairs or tools are moved. 3:The microphone on the female actor's chest rubs against her accessories, picking up too much accessory noise, affecting the clarity of the dialogue. 4:There is a large volume difference between the male and f…
