# Supplementary material
Source: ML conference proceedings conference paper supplement (https://openreview.net/forum?id=N0LRisF0ZU)
Supplement: supplementary_material [file Test2-Video Download Link.docx]

Test 2- Synchronized Sound Recording Listening Test

Video（test HD video footage）download link：

<https://file.io/wXHEiyLacF2l>
